# Supplementary material for: Antihypothyroid Effect of Salidroside
Source: MDPI journal article supplement (doi:10.3390/molecules27217487), 2022-11-02
Supplement: s1 [file s1]

# **Supplementary Materials**

## **Antihypothyroid Effect of Salidroside**

**Nazym K. Korbozova, Nataliya O. Kudrina, Nataliya A. Zhukova, Alexander E. Grazhdannikov, Irina V. Blavachinskaya, Gulnaz A. Seitimova, Timur E. Kulmanov, Tatyana G. Tolstikova \* and Nina V. Terletskaya \***

\*Correspondence: tg\_tolstikova@mail.ru (T.G.T.); teni02@mail.ru (N.V.T.); Tel.: +7-(913)-7280399 (T.G.T.); Tel.: +7-(777)-2993335 (N.T.V.)

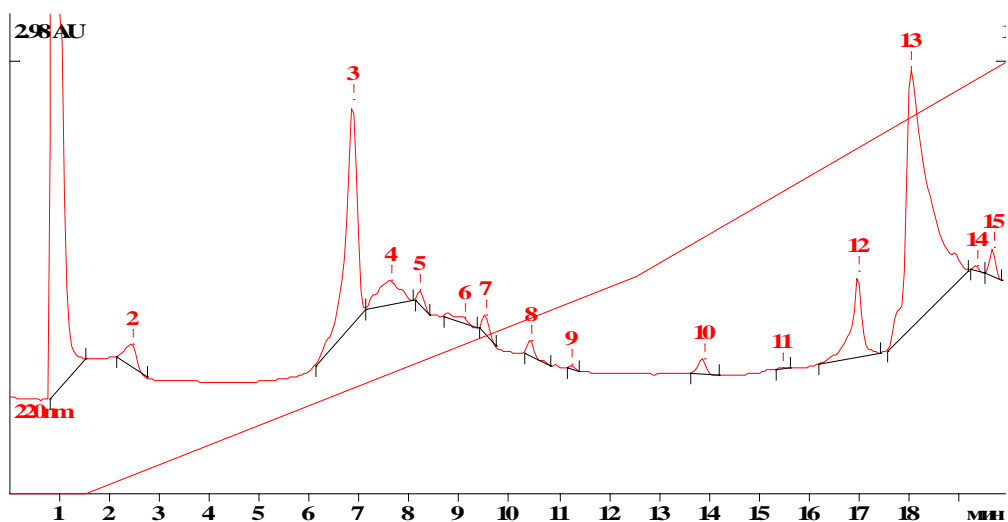

Report date: 06.12.2021 17:10:49  
 SAMPLE: Tyrosol 2; 3.3mg/20ml MeOH; 20mkl  
 Volume: 20.0 µl  
 COLUMN: ProntoSil-120-5-C18 AQ  
 Size: 2.0 x 75 mm  
 Part.size: 5.0 µm  
  
 Comments Tyrosol 2; in MeOH; MeOH-H3PO4 1:9-11:9-1:0 300:2500:4000  
 Flow: 200.00 mkl/min  
 Temperature: 35.0°C  
 Pressure: 5.0 MPa

| No | Retention, mkl | Height, AU | Area, AU*mkl | Area, % | Tyrosol |
|----|----------------|------------|--------------|---------|---------|
| 1  | 180.24         | 18.30      | 586.421      | 63.16   |         |
| 2  | 492.53         | 0.16       | 8.668        | 0.93    |         |
| 3  | 1375.70        | 1.55       | 80.025       | 8.62    |         |
| 4  | 1524.65        | 0.17       | 17.219       | 1.85    |         |
| 5  | 1645.42        | 0.12       | 3.189        | 0.34    |         |
| 6  | 1818.39        | 0.04       | 3.341        | 0.36    |         |
| 7  | 1908.40        | 0.16       | 4.843        | 0.52    |         |
| 8  | 2085.03        | 0.11       | 3.453        | 0.37    |         |
| 9  | 2248.24        | 0.03       | 0.663        | 0.07    |         |
| 10 | 2772.97        | 0.10       | 3.575        | 0.39    |         |
| 11 | 3087.52        | 0.01       | 0.362        | 0.04    |         |
| 12 | 3395.23        | 0.59       | 28.326       | 3.05    |         |
| 13 | 3606.74        | 1.79       | 182.070      | 19.61   |         |
| 14 | 3867.17        | 0.05       | 1.332        | 0.14    |         |
| 15 | 3932.19        | 0.20       | 5.016        | 0.54    |         |
|    | 3981.63        | 23.37      | 928.504      | 100.00  |         |

**Figure S1.** Chromatogram of tyrosol calibration solution-2 (220nm)

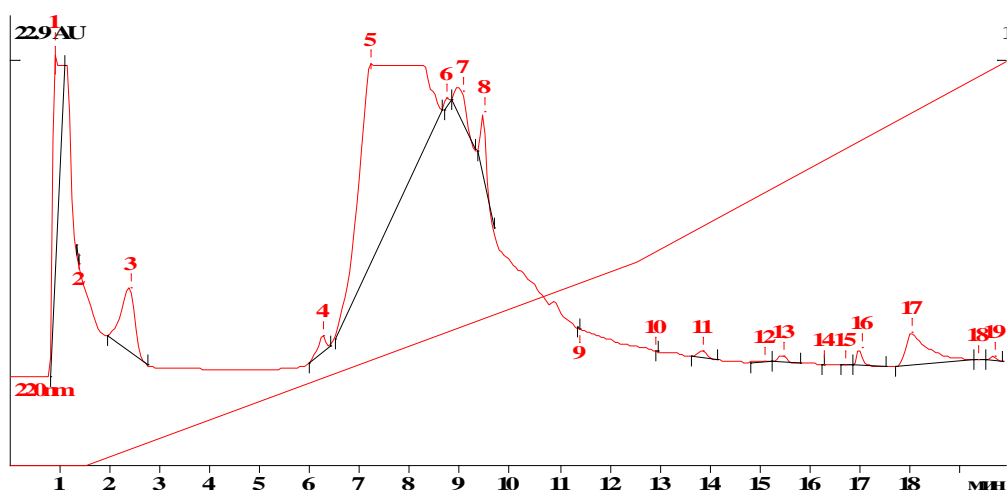

Report date: 06.12.2021 17:09:06  
 SAMPLE: Extr 4(upar); 169.8mg/3ml MeOH-H<sub>2</sub>O(2:1); 20mkl  
 Volume: 20.0 µl  
 COLUMN: ProntoSil-120-5-C18 AQ  
 Size: 2.0 x 75 mm  
 Part.size: 5.0 µm  
 Comments: Extr 4(upar); in MeOH-H<sub>2</sub>O; MeOH-H<sub>3</sub>PO<sub>4</sub> 1:9-11:9-1:0 300:2500:4000  
 Flow: 200.00 mkl/min  
 Temperature: 35.0°C  
 Pressure: 5.0 MPa

| No | Retention, mkl | Height, AU | Area, AU*mkl | Area, % | Tyrosol |
|----|----------------|------------|--------------|---------|---------|
| 1  | 179.39         | 13.04      | 340.195      | 9.88    |         |
| 2  | 270.65         | -0.06      | -0.329       | -0.01   |         |
| 3  | 479.76         | 3.59       | 232.402      | 6.75    |         |
| 4  | 1250.88        | 0.86       | 27.442       | 0.80    |         |
| 5  | 1445.62        | 11.01      | 2381.572     | 69.20   |         |
| 6  | 1743.63        | 0.43       | 6.033        | 0.18    |         |
| 7  | 1807.77        | 1.76       | 85.933       | 2.50    |         |
| 8  | 1896.01        | 4.02       | 109.105      | 3.17    |         |
| 9  | 2274.53        | 0.00       | -0.012       | 0.00    |         |
| 10 | 2581.62        | 0.00       | -0.016       | 0.00    |         |
| 11 | 2769.09        | 0.37       | 14.597       | 0.42    |         |
| 12 | 3011.84        | 0.03       | 1.311        | 0.04    |         |
| 13 | 3091.84        | 0.40       | 16.502       | 0.48    |         |
| 14 | 3247.84        | 0.00       | -0.006       | 0.00    |         |
| 15 | 3335.29        | 0.01       | 0.292        | 0.01    |         |
| 16 | 3396.28        | 1.01       | 25.233       | 0.73    |         |
| 17 | 3604.27        | 1.85       | 192.118      | 5.58    |         |
| 18 | 3869.58        | 0.05       | 1.013        | 0.03    |         |
| 19 | 3931.22        | 0.28       | 7.663        | 0.22    |         |
|    | 3981.73        | 38.77      | 3441.775     | 100.00  |         |

Dry residue content in extract 4:  $(100 \cdot 0.4367) / 42.8450 = 1.02 \%$

Tyrosol content in dry part of extract 4:  $(100 \cdot 27.442 \cdot 3.3/20) / (80.025 \cdot 169.8/3) = 0.0999\%$  (calibr. sol. 2 – 220nm)

Salidroside content in the dry part of extract 4: 0.217%

**Figure S2.** Determination of salidroside content during the flowering in the root of the plants of *R. semenovii*
